# Supplementary material for: Prognostic Value of Mid-Region Proadrenomedullin and In Vitro Interferon Gamma Production for In-Hospital Mortality in Patients with COVID-19 Pneumonia and Respiratory Failure: An Observational Prospective Study
Source: MDPI journal article supplement (doi:10.3390/v14081683), 2022-07-30

## Supplementary materials:

**Supplementary Table S1:** clinical and laboratory characteristics of the study population other than what shown in Table 1

|                                                                                       | <b>Overall<br/>(N= 100)</b> | <b>survivors<br/>(N= 87)</b> | <b>deceased<br/>(N= 13)</b> | <b>p value</b> |
|---------------------------------------------------------------------------------------|-----------------------------|------------------------------|-----------------------------|----------------|
| <b>COMORBIDITIES</b>                                                                  |                             |                              |                             |                |
| Myocardial infarction                                                                 | 14 (14.0)                   | 11 (12.6)                    | 3 (23.1)                    | 0.390          |
| Congestive heart failure                                                              | 3 (3.0)                     | 0                            | 3 (23.1)                    | <b>0.002</b>   |
| Peripheral vascular disease                                                           | 5 (5.0)                     | 2 (2.3)                      | 3 (23.1)                    | <b>0.015</b>   |
| Cerebrovascular disease                                                               | 7 (7.0)                     | 6 (6.9)                      | 1 (7.7)                     | 1.000          |
| Dementia                                                                              | 1 (1.0)                     | 0                            | 1 (7.7)                     | 0.130          |
| COPD                                                                                  | 5 (5.0)                     | 4 (4.6)                      | 1 (7.7)                     | 0.509          |
| Connective tissue disease                                                             | 0                           | 0                            | 0                           | -              |
| Gastroduodenal ulcer                                                                  | 3 (3.0)                     | 3 (3.5)                      | 0                           | 1.000          |
| Hepatopathy                                                                           | 1 (1.0)                     | 0                            | 1 (7.7)                     | 0.130          |
| Diabetes mellitus                                                                     | 19 (19.0)                   | 12 (13.8)                    | 7 (53.8)                    | <b>0.003</b>   |
| With organ damage                                                                     | 2 (2.0)                     | 1 (1.2)                      | 1 (7.7)                     |                |
| Hemiplegia                                                                            | 1 (1.0)                     | 1 (1.6)                      | 0                           | 1.000          |
| Chronic renal failure (Moderate/severe)                                               | 4 (4.0)                     | 3 (3.5)                      | 1 (7.7)                     | 0.432          |
| Cancers                                                                               | 3 (3.0)                     | 2 (2.3)                      | 1 (7.7)                     | 0.345          |
| HIV infection in AIDS                                                                 | 0                           | 0                            | 0                           | -              |
| <b>CLINICAL AND LABORATORY CHARACTERISTICS AT T0 (other than reported in Table 1)</b> |                             |                              |                             |                |
| SARS-Cov2 Variants/Lineages                                                           |                             |                              |                             |                |
| Alpha (B.1.1.7)                                                                       | 30 (30.0)                   | 24 (27.6)                    | 6 (46.1)                    | 0.401          |
| Delta (B.1.617.2)                                                                     | 24 (24.0)                   | 22 (25.4)                    | 2 (15.4)                    |                |
| Eta (B.1.525)                                                                         | 1 (1.0)                     | 1 (1.1)                      | 0                           |                |
| Gamma (P.1)                                                                           | 1 (1.0)                     | 1 (1.1)                      | 0                           |                |
| Other lineages (no VOC detected)                                                      | 44 (44.0)                   | 39 (44.8)                    | 5 (38.5)                    |                |
| Leukocytes (mmc)                                                                      | 6.34 (4.78-8.82)            | 6.33 (4.76-8.97)             | 6.34 (5.42-7.83)            | 0.858          |
| PCT (mcg/L) (n=49)                                                                    | 0.12 (0.07-0.23)            | 0.12 (0.06-0.24)             | 0.13 (0.10-0.23)            | 0.643          |
| Ferritin (mcg/L)                                                                      | 791.0<br>(455.0-1332.0)     | 897.0<br>(470.0-1427.0)      | 520.0<br>(333.0-661.0)      | <b>0.022</b>   |
| <b>THERAPIES ADMINISTERED DURING HOSPITALIZATION</b>                                  |                             |                              |                             |                |
| Antibiotic therapy                                                                    | 35 (35.0)                   | 28 (32.2)                    | 7 (53.9)                    | 0.211          |
| Remdesivir                                                                            | 25 (25.0)                   | 25 (28.7)                    | 0                           | <b>0.034</b>   |
| Monoclonals casirivimab/imdevimab                                                     | 3 (3.0)                     | 3 (3.5)                      | 0                           | 1.000          |
| <b>COMPLICATIONS OCCURRED DURING HOSPITALIZATION</b>                                  |                             |                              |                             |                |
| Secondary infections                                                                  | 21 (21.0)                   | 17 (19.5)                    | 4 (30.8)                    | 0.464          |
| Thromboembolic events                                                                 | 9 (9.0)                     | 8 (9.2)                      | 1 (7.7)                     | 1.000          |

Categorical variables are expressed as counts and percentages and continuous variables as medians and interquartile ranges. Legend: COPD chronic obstructive pulmonary disease, PCT procalcitonin

**Supplementary Figure S1:** AUROC analysis of currently employed inflammatory markers (lymphocyte count, CRP, ferritin levels) for in-hospital mortality, at T0 (**panel A**) and T1 (**panel B**).

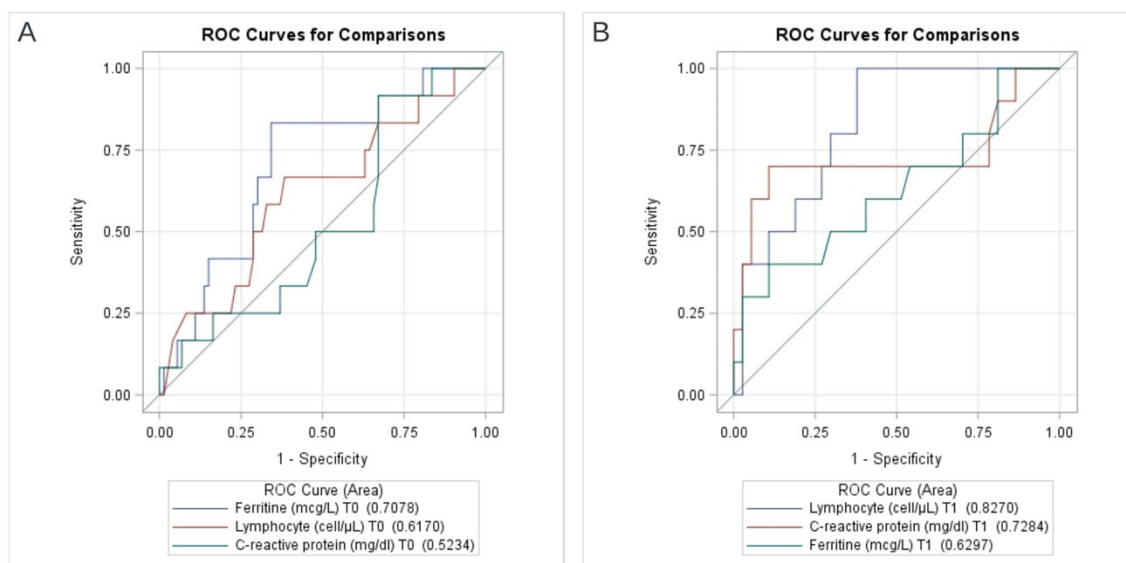

Supplement: s1 [file s1]
